# Supplementary material for: Human leukocyte antigen class I and class II alleles are associated with susceptibility and resistance in borderline leprosy patients from Southeast Brazil
Source: PubMed Central journal article supplement (PMC4307149; doi:10.1186/s12879-015-0751-0), 2015-01-21
Supplement: 12879_2015_751_MOESM1_ESM.pdf [file 12879_2015_751_MOESM1_ESM.pdf]

**Additional file 1.1. HLA-A\*, B\*, C\*, DRB1\* and DQB1\* alleles frequencies in 202 patients with B leprosy and 478 healthy controls.**

| HLA allele     | B leprosy (N=202) |        | Controls (N= 478) |        | p     | HLA allele     | B leprosy (N=202) |        | Controls (N= 478) |        | p     |
|----------------|-------------------|--------|-------------------|--------|-------|----------------|-------------------|--------|-------------------|--------|-------|
|                | n                 | Fa (%) | n                 | Fa (%) |       |                | n                 | Fa (%) | n                 | Fa (%) |       |
|                | <b>A*01</b>       | 32     | 15.84             | 82     |       |                | 17.15             | 0.736  | <b>A*31</b>       | 13     |       |
| <b>A*02</b>    | 107               | 53.00  | 236               | 49.37  | 0.402 | <b>A*32</b>    | 11                | 5.44   | 34                | 7.11   | 0.501 |
| <b>A*03</b>    | 50                | 24.75  | 95                | 19.87  | 0.182 | <b>A*33</b>    | 12                | 5.94   | 25                | 5.23   | 0.713 |
| <b>A*11</b>    | 22                | 10.89  | 56                | 11.71  | 0.794 | <b>A*34</b>    | 02                | 0.99   | 11                | 2.30   | 0.363 |
| <b>A*23</b>    | 14                | 6.93   | 47                | 9.83   | 0.244 | <b>A*36</b>    | 02                | 0.99   | 06                | 1.25   | 1.000 |
| <b>A*24</b>    | 40                | 19.80  | 101               | 21.13  | 0.756 | <b>A*66</b>    | 02                | 0.99   | 05                | 1.05   | 1.000 |
| <b>A*25</b>    | 03                | 1.48   | 13                | 2.72   | 0.416 | <b>A*68</b>    | 25                | 12.38  | 51                | 10.67  | 0.508 |
| <b>A*26</b>    | 20                | 9.90   | 38                | 7.95   | 0.452 | <b>A*69</b>    | 00                | 0.00   | 03                | 0.63   | 0.558 |
| <b>A*29</b>    | 16                | 7.92   | 48                | 10.04  | 0.472 | <b>A*74</b>    | 05                | 2.47   | 04                | 0.84   | 0.134 |
| <b>A*30</b>    | 27                | 13.37  | 52                | 10.88  | 0.361 | <b>A*80</b>    | 01                | 0.49   | 01                | 0.21   | 0.506 |
| <b>B*07</b>    | 38                | 18.81  | 61                | 12.78  | 0.043 | <b>B*47</b>    | 02                | 0.99   | 00                | 0.00   | 0.087 |
| <b>B*08</b>    | 25                | 12.38  | 49                | 10.27  | 0.420 | <b>B*48</b>    | 01                | 0.49   | 03                | 0.62   | 1.000 |
| <b>B*13</b>    | 08                | 3.96   | 22                | 4.61   | 0.839 | <b>B*49</b>    | 02                | 0.99   | 29                | 6.07   | 0.002 |
| <b>B*14</b>    | 20                | 9.90   | 47                | 9.85   | 1.000 | <b>B*50</b>    | 04                | 1.98   | 30                | 6.28   | 0.019 |
| <b>B*15</b>    | 41                | 20.30  | 80                | 16.77  | 0.273 | <b>B*51</b>    | 35                | 17.33  | 86                | 18.02  | 0.912 |
| <b>B*18</b>    | 25                | 12.38  | 64                | 13.41  | 0.803 | <b>B*52</b>    | 07                | 3.46   | 19                | 3.98   | 0.830 |
| <b>B*27</b>    | 04                | 1.98   | 20                | 4.19   | 0.178 | <b>B*53</b>    | 13                | 6.43   | 14                | 2.93   | 0.050 |
| <b>B*35</b>    | 44                | 21.78  | 103               | 21.55  | 1.000 | <b>B*54</b>    | 00                | 0.00   | 01                | 0.20   | 1.000 |
| <b>B*37</b>    | 04                | 1.98   | 13                | 2.72   | 0.789 | <b>B*55</b>    | 03                | 1.48   | 14                | 2.93   | 0.420 |
| <b>B*38</b>    | 09                | 4.45   | 21                | 4.40   | 1.000 | <b>B*56</b>    | 01                | 0.49   | 04                | 0.83   | 1.000 |
| <b>B*39</b>    | 15                | 7.42   | 30                | 6.28   | 0.613 | <b>B*57</b>    | 10                | 4.95   | 25                | 5.24   | 1.000 |
| <b>B*40</b>    | 23                | 11.39  | 50                | 10.46  | 0.786 | <b>B*58</b>    | 12                | 5.94   | 24                | 5.03   | 0.707 |
| <b>B*41</b>    | 02                | 0.99   | 04                | 0.83   | 1.000 | <b>B*59</b>    | 00                | 0.00   | 01                | 0.20   | 1.000 |
| <b>B*42</b>    | 06                | 2.97   | 19                | 3.98   | 0.657 | <b>B*73</b>    | 00                | 0.00   | 01                | 0.20   | 1.000 |
| <b>B*44</b>    | 35                | 17.33  | 98                | 20.54  | 0.397 | <b>B*78</b>    | 00                | 0.00   | 01                | 0.20   | 1.000 |
| <b>B*45</b>    | 10                | 4.95   | 18                | 3.77   | 0.527 | <b>B*81</b>    | 05                | 2.47   | 05                | 1.05   | 0.172 |
| <b>C*01</b>    | 08                | 3.96   | 34                | 7.11   | 0.161 | <b>C*08</b>    | 25                | 12.38  | 47                | 9.83   | 0.340 |
| <b>C*02</b>    | 18                | 8.91   | 63                | 13.18  | 0.122 | <b>C*12</b>    | 31                | 15.35  | 64                | 13.39  | 0.545 |
| <b>C*03</b>    | 53                | 26.24  | 104               | 21.75  | 0.232 | <b>C*14</b>    | 08                | 3.96   | 18                | 3.76   | 1.000 |
| <b>C*04</b>    | 61                | 30.20  | 144               | 30.12  | 1.000 | <b>C*15</b>    | 20                | 9.90   | 50                | 10.46  | 0.890 |
| <b>C*05</b>    | 12                | 5.94   | 67                | 14.02  | 0.002 | <b>C*16</b>    | 21                | 10.4   | 26                | 5.44   | 0.030 |
| <b>C*06</b>    | 36                | 17.82  | 96                | 20.08  | 0.525 | <b>C*17</b>    | 08                | 3.96   | 23                | 4.81   | 0.692 |
| <b>C*07</b>    | 99                | 49.00  | 216               | 45.19  | 0.400 | <b>C*18</b>    | 04                | 1.98   | 04                | 0.84   | 0.246 |
| <b>DRB1*01</b> | 38                | 18.81  | 94                | 19.66  | 0.832 | <b>DRB1*11</b> | 55                | 27.23  | 108               | 22.59  | 0.202 |
| <b>DRB1*03</b> | 41                | 20.30  | 85                | 17.78  | 0.450 | <b>DRB1*12</b> | 04                | 1.98   | 15                | 3.13   | 0.610 |
| <b>DRB1*04</b> | 38                | 18.81  | 87                | 18.20  | 0.913 | <b>DRB1*13</b> | 64                | 31.68  | 155               | 32.42  | 0.928 |
| <b>DRB1*07</b> | 33                | 16.34  | 128               | 26.77  | 0.003 | <b>DRB1*14</b> | 19                | 9.40   | 56                | 11.71  | 0.423 |
| <b>DRB1*08</b> | 20                | 9.90   | 36                | 7.53   | 0.359 | <b>DRB1*15</b> | 55                | 27.23  | 111               | 23.22  | 0.283 |
| <b>DRB1*09</b> | 06                | 2.97   | 20                | 4.18   | 0.519 | <b>DRB1*16</b> | 22                | 10.9   | 36                | 7.53   | 0.175 |
| <b>DRB1*10</b> | 09                | 4.45   | 25                | 5.23   | 0.847 |                |                   |        |                   |        |       |
| <b>DQB1*02</b> | 67                | 33.17  | 189               | 39.53  | 0.120 | <b>DQB1*05</b> | 93                | 46.04  | 192               | 40.16  | 0.173 |
| <b>DQB1*03</b> | 119               | 58.91  | 298               | 62.34  | 0.438 | <b>DQB1*06</b> | 106               | 52.47  | 224               | 46.86  | 0.207 |
| <b>DQB1*04</b> | 19                | 9.40   | 53                | 11.08  | 0.586 |                |                   |        |                   |        |       |

N: number of individuals, n: number of alleles (2n), %: allele frequency, p: Fisher's exact test (p ≤ 0.05).

**Additional file 1.2. HLA-A\*, B\*, C\*, DRB1\* and DQB1\* alleles frequencies in 88 BB leprosy and 478 healthy controls.**

| HLA allele     | BB leprosy (N=88) |        | Controls (N=478) |        | p     | HLA allele     | BB leprosy (N=88) |        | Controls (N=478) |        | p     |
|----------------|-------------------|--------|------------------|--------|-------|----------------|-------------------|--------|------------------|--------|-------|
|                | n                 | Fa (%) | n                | Fa (%) |       |                | n                 | Fa (%) | n                | Fa (%) |       |
|                | <b>A*01</b>       | 17     | 19.31            | 82     |       |                | 17.15             | 0.647  | <b>A*31</b>      | 07     |       |
| <b>A*02</b>    | 44                | 50.00  | 236              | 49.37  | 1.000 | <b>A*32</b>    | 04                | 4.54   | 34               | 7.11   | 0.490 |
| <b>A*03</b>    | 21                | 23.86  | 95               | 19.87  | 0.391 | <b>A*33</b>    | 03                | 3.41   | 25               | 5.23   | 0.600 |
| <b>A*11</b>    | 14                | 15.90  | 56               | 11.71  | 0.290 | <b>A*34</b>    | 02                | 2.27   | 11               | 2.30   | 1.000 |
| <b>A*23</b>    | 04                | 4.54   | 47               | 9.83   | 0.153 | <b>A*36</b>    | 00                | 0.00   | 06               | 1.25   | 0.597 |
| <b>A*24</b>    | 19                | 21.59  | 101              | 21.13  | 0.888 | <b>A*66</b>    | 00                | 0.00   | 05               | 1.05   | 1.000 |
| <b>A*25</b>    | 01                | 1.14   | 13               | 2.72   | 0.707 | <b>A*68</b>    | 13                | 14.77  | 51               | 10.67  | 0.272 |
| <b>A*26</b>    | 10                | 11.36  | 38               | 7.95   | 0.298 | <b>A*69</b>    | 00                | 0.00   | 03               | 0.63   | 1.000 |
| <b>A*29</b>    | 05                | 5.68   | 48               | 10.04  | 0.235 | <b>A*74</b>    | 01                | 1.14   | 04               | 0.84   | 0.571 |
| <b>A*30</b>    | 11                | 12.50  | 52               | 10.88  | 0.711 | <b>A*80</b>    | 00                | 0.00   | 01               | 0.21   | 1.000 |
| <b>B*07</b>    | 13                | 14.77  | 61               | 12.78  | 0.606 | <b>B*47</b>    | 01                | 1.14   | 00               | 0.00   | 0.155 |
| <b>B*08</b>    | 12                | 13.64  | 49               | 10.27  | 0.350 | <b>B*48</b>    | 00                | 0.00   | 03               | 0.62   | 1.000 |
| <b>B*13</b>    | 02                | 2.27   | 22               | 4.61   | 0.561 | <b>B*49</b>    | 00                | 0.00   | 29               | 6.07   | 0.014 |
| <b>B*14</b>    | 10                | 11.36  | 47               | 9.85   | 0.699 | <b>B*50</b>    | 01                | 1.14   | 30               | 6.28   | 0.069 |
| <b>B*15</b>    | 13                | 14.77  | 80               | 16.77  | 0.754 | <b>B*51</b>    | 12                | 13.64  | 86               | 18.02  | 0.361 |
| <b>B*18</b>    | 10                | 11.36  | 64               | 13.41  | 0.731 | <b>B*52</b>    | 05                | 5.68   | 19               | 3.98   | 0.400 |
| <b>B*27</b>    | 04                | 4.54   | 20               | 4.19   | 0.778 | <b>B*53</b>    | 04                | 4.54   | 14               | 2.93   | 0.503 |
| <b>B*35</b>    | 21                | 23.86  | 103              | 21.55  | 0.674 | <b>B*54</b>    | 00                | 0.00   | 01               | 0.20   | 1.000 |
| <b>B*37</b>    | 03                | 3.41   | 13               | 2.72   | 0.724 | <b>B*55</b>    | 01                | 1.14   | 14               | 2.93   | 0.486 |
| <b>B*38</b>    | 05                | 5.68   | 21               | 4.40   | 0.580 | <b>B*56</b>    | 01                | 1.14   | 04               | 0.83   | 0.571 |
| <b>B*39</b>    | 04                | 4.54   | 30               | 6.28   | 0.633 | <b>B*57</b>    | 05                | 5.68   | 25               | 5.24   | 0.798 |
| <b>B*40</b>    | 13                | 14.77  | 50               | 10.46  | 0.267 | <b>B*58</b>    | 10                | 11.36  | 24               | 5.03   | 0.028 |
| <b>B*41</b>    | 02                | 2.27   | 04               | 0.83   | 0.236 | <b>B*59</b>    | 00                | 0.00   | 01               | 0.20   | 1.000 |
| <b>B*42</b>    | 03                | 3.41   | 19               | 3.98   | 1.000 | <b>B*73</b>    | 00                | 0.00   | 01               | 0.20   | 1.000 |
| <b>B*44</b>    | 16                | 18.18  | 98               | 20.54  | 0.667 | <b>B*78</b>    | 00                | 0.00   | 01               | 0.20   | 1.000 |
| <b>B*45</b>    | 04                | 4.54   | 18               | 3.77   | 0.762 | <b>B*81</b>    | 01                | 1.14   | 05               | 1.05   | 1.000 |
| <b>C*01</b>    | 05                | 5.68   | 34               | 7.11   | 0.819 | <b>C*08</b>    | 12                | 13.64  | 47               | 9.83   | 0.340 |
| <b>C*02</b>    | 07                | 7.95   | 63               | 13.18  | 0.217 | <b>C*12</b>    | 19                | 21.59  | 64               | 13.39  | 0.050 |
| <b>C*03</b>    | 20                | 22.73  | 104              | 21.75  | 0.888 | <b>C*14</b>    | 00                | 0.00   | 18               | 3.76   | 0.091 |
| <b>C*04</b>    | 25                | 28.41  | 144              | 30.12  | 0.800 | <b>C*15</b>    | 08                | 9.09   | 50               | 10.46  | 0.848 |
| <b>C*05</b>    | 05                | 5.68   | 67               | 14.02  | 0.035 | <b>C*16</b>    | 07                | 7.95   | 26               | 5.44   | 0.328 |
| <b>C*06</b>    | 21                | 23.86  | 96               | 20.08  | 0.473 | <b>C*17</b>    | 04                | 4.54   | 23               | 4.81   | 1.000 |
| <b>C*07</b>    | 41                | 46.59  | 216              | 45.19  | 0.816 | <b>C*18</b>    | 02                | 2.27   | 04               | 0.84   | 0.236 |
| <b>DRB1*01</b> | 14                | 15.91  | 94               | 19.66  | 0.463 | <b>DRB1*11</b> | 26                | 29.54  | 108              | 22.59  | 0.172 |
| <b>DRB1*03</b> | 17                | 19.32  | 85               | 17.78  | 0.762 | <b>DRB1*12</b> | 01                | 1.14   | 15               | 3.13   | 0.487 |
| <b>DRB1*04</b> | 18                | 20.45  | 87               | 18.20  | 0.769 | <b>DRB1*13</b> | 25                | 28.41  | 155              | 32.42  | 0.533 |
| <b>DRB1*07</b> | 16                | 18.18  | 128              | 26.77  | 0.109 | <b>DRB1*14</b> | 10                | 11.36  | 56               | 11.71  | 1.000 |
| <b>DRB1*08</b> | 06                | 6.82   | 36               | 7.53   | 1.000 | <b>DRB1*15</b> | 26                | 29.54  | 111              | 23.22  | 0.223 |
| <b>DRB1*09</b> | 01                | 1.14   | 20               | 4.18   | 0.226 | <b>DRB1*16</b> | 10                | 11.36  | 36               | 7.53   | 0.285 |
| <b>DRB1*10</b> | 06                | 6.82   | 25               | 5.23   | 0.608 |                |                   |        |                  |        |       |
| <b>DQB1*02</b> | 29                | 32.95  | 189              | 39.53  | 0.283 | <b>DQB1*05</b> | 41                | 46.59  | 192              | 40.16  | 0.289 |
| <b>DQB1*03</b> | 54                | 61.36  | 298              | 62.34  | 0.904 | <b>DQB1*06</b> | 45                | 51.14  | 224              | 46.86  | 0.487 |
| <b>DQB1*04</b> | 07                | 7.95   | 53               | 11.08  | 0.454 |                |                   |        |                  |        |       |

N: number of individuals, n: number of alleles (2n), %: allele frequency, p: Fisher's exact test (p ≤ 0.05).

**Additional file 1.3. HLA-A\*, B\*, C\*, DRB1\* and DQB1\* alleles frequencies in 70 BT leprosy and 478 healthy controls.**

| HLA allele     | BT leprosy (N=70) |        | Controls (N=478) |        | p     | HLA allele     | BT leprosy (N=70) |        | Controls (N=478) |        | p     |
|----------------|-------------------|--------|------------------|--------|-------|----------------|-------------------|--------|------------------|--------|-------|
|                | n                 | Fa (%) | n                | Fa (%) |       |                | n                 | Fa (%) | n                | Fa (%) |       |
|                | <b>A*01</b>       | 13     | 18.57            | 82     |       |                | 17.15             | 0.737  | <b>A*31</b>      | 04     |       |
| <b>A*02</b>    | 37                | 52.86  | 236              | 49.37  | 0.610 | <b>A*32</b>    | 03                | 4.28   | 34               | 7.11   | 0.607 |
| <b>A*03</b>    | 19                | 27.14  | 95               | 19.87  | 0.159 | <b>A*33</b>    | 08                | 11.43  | 25               | 5.23   | 0.056 |
| <b>A*11</b>    | 05                | 7.14   | 56               | 11.71  | 0.313 | <b>A*34</b>    | 00                | 0.00   | 11               | 2.30   | 0.374 |
| <b>A*23</b>    | 04                | 5.71   | 47               | 9.83   | 0.377 | <b>A*36</b>    | 01                | 1.43   | 06               | 1.25   | 1.000 |
| <b>A*24</b>    | 13                | 18.57  | 101              | 21.13  | 0.752 | <b>A*66</b>    | 02                | 2.86   | 05               | 1.05   | 0.221 |
| <b>A*25</b>    | 02                | 2.86   | 13               | 2.72   | 1.000 | <b>A*68</b>    | 08                | 11.43  | 51               | 10.67  | 0.836 |
| <b>A*26</b>    | 05                | 7.14   | 38               | 7.95   | 1.000 | <b>A*69</b>    | 00                | 0.00   | 03               | 0.63   | 1.000 |
| <b>A*29</b>    | 04                | 5.71   | 48               | 10.04  | 0.380 | <b>A*74</b>    | 02                | 2.86   | 04               | 0.84   | 0.171 |
| <b>A*30</b>    | 10                | 14.28  | 52               | 10.88  | 0.418 | <b>A*80</b>    | 00                | 0.00   | 01               | 0.21   | 1.000 |
| <b>B*07</b>    | 15                | 21.43  | 61               | 12.78  | 0.062 | <b>B*47</b>    | 01                | 1.43   | 00               | 0.00   | 0.127 |
| <b>B*08</b>    | 10                | 14.28  | 49               | 10.27  | 0.304 | <b>B*48</b>    | 01                | 1.43   | 03               | 0.62   | 0.422 |
| <b>B*13</b>    | 03                | 4.28   | 22               | 4.61   | 1.000 | <b>B*49</b>    | 00                | 0.00   | 29               | 6.07   | 0.039 |
| <b>B*14</b>    | 08                | 11.43  | 47               | 9.85   | 0.670 | <b>B*50</b>    | 01                | 1.43   | 30               | 6.28   | 0.160 |
| <b>B*15</b>    | 16                | 22.85  | 80               | 16.77  | 0.237 | <b>B*51</b>    | 16                | 22.85  | 86               | 18.02  | 0.326 |
| <b>B*18</b>    | 11                | 15.71  | 64               | 13.41  | 0.578 | <b>B*52</b>    | 02                | 2.86   | 19               | 3.98   | 1.000 |
| <b>B*27</b>    | 00                | 0.00   | 20               | 4.19   | 0.093 | <b>B*53</b>    | 06                | 8.57   | 14               | 2.93   | 0.031 |
| <b>B*35</b>    | 14                | 20.00  | 103              | 21.55  | 0.876 | <b>B*54</b>    | 00                | 0.00   | 01               | 0.20   | 1.000 |
| <b>B*37</b>    | 02                | 2.86   | 13               | 2.72   | 1.000 | <b>B*55</b>    | 02                | 2.86   | 14               | 2.93   | 1.000 |
| <b>B*38</b>    | 02                | 2.86   | 21               | 4.4    | 0.754 | <b>B*56</b>    | 00                | 0.00   | 04               | 0.83   | 1.000 |
| <b>B*39</b>    | 06                | 8.57   | 30               | 6.28   | 0.441 | <b>B*57</b>    | 03                | 4.28   | 25               | 5.24   | 1.000 |
| <b>B*40</b>    | 02                | 2.86   | 50               | 10.46  | 0.047 | <b>B*58</b>    | 02                | 2.86   | 24               | 5.03   | 0.559 |
| <b>B*41</b>    | 00                | 0.00   | 04               | 0.83   | 1.000 | <b>B*59</b>    | 00                | 0.00   | 01               | 0.20   | 1.000 |
| <b>B*42</b>    | 03                | 4.28   | 19               | 3.98   | 0.752 | <b>B*73</b>    | 00                | 0.00   | 01               | 0.20   | 1.000 |
| <b>B*44</b>    | 09                | 12.86  | 98               | 20.54  | 0.149 | <b>B*78</b>    | 00                | 0.00   | 01               | 0.20   | 1.000 |
| <b>B*45</b>    | 02                | 2.86   | 18               | 3.77   | 1.000 | <b>B*81</b>    | 03                | 4.28   | 05               | 1.05   | 0.069 |
| <b>C*01</b>    | 02                | 2.86   | 34               | 7.11   | 0.297 | <b>C*08</b>    | 09                | 12.85  | 47               | 9.83   | 0.403 |
| <b>C*02</b>    | 04                | 5.71   | 63               | 13.18  | 0.080 | <b>C*12</b>    | 08                | 11.43  | 64               | 13.39  | 0.849 |
| <b>C*03</b>    | 17                | 24.28  | 104              | 21.75  | 0.644 | <b>C*14</b>    | 04                | 5.71   | 18               | 3.76   | 0.508 |
| <b>C*04</b>    | 24                | 34.28  | 144              | 30.12  | 0.489 | <b>C*15</b>    | 10                | 14.28  | 50               | 10.46  | 0.311 |
| <b>C*05</b>    | 03                | 4.28   | 67               | 14.02  | 0.020 | <b>C*16</b>    | 09                | 12.86  | 26               | 5.44   | 0.031 |
| <b>C*06</b>    | 09                | 12.85  | 96               | 20.08  | 0.192 | <b>C*17</b>    | 04                | 5.71   | 23               | 4.81   | 0.765 |
| <b>C*07</b>    | 35                | 50.00  | 216              | 45.19  | 0.521 | <b>C*18</b>    | 02                | 2.86   | 04               | 0.84   | 0.171 |
| <b>DRB1*01</b> | 11                | 15.71  | 94               | 19.66  | 0.516 | <b>DRB1*11</b> | 15                | 21.43  | 108              | 22.59  | 0.879 |
| <b>DRB1*03</b> | 20                | 28.57  | 85               | 17.78  | 0.049 | <b>DRB1*12</b> | 02                | 2.86   | 15               | 3.13   | 1.000 |
| <b>DRB1*04</b> | 11                | 15.71  | 87               | 18.20  | 0.738 | <b>DRB1*13</b> | 26                | 37.14  | 155              | 32.42  | 0.496 |
| <b>DRB1*07</b> | 12                | 17.14  | 128              | 26.77  | 0.105 | <b>DRB1*14</b> | 05                | 7.14   | 56               | 11.71  | 0.313 |
| <b>DRB1*08</b> | 07                | 10.00  | 36               | 7.53   | 0.474 | <b>DRB1*15</b> | 17                | 24.28  | 111              | 23.22  | 0.879 |
| <b>DRB1*09</b> | 04                | 5.71   | 20               | 4.18   | 0.531 | <b>DRB1*16</b> | 09                | 12.86  | 36               | 7.53   | 0.157 |
| <b>DRB1*10</b> | 01                | 1.43   | 25               | 5.23   | 0.231 |                |                   |        |                  |        |       |
| <b>DQB1*02</b> | 30                | 42.85  | 189              | 39.53  | 0.603 | <b>DQB1*05</b> | 30                | 42.85  | 192              | 40.16  | 0.696 |
| <b>DQB1*03</b> | 36                | 51.43  | 298              | 62.34  | 0.088 | <b>DQB1*06</b> | 37                | 52.85  | 224              | 46.86  | 0.371 |
| <b>DQB1*04</b> | 07                | 10.00  | 53               | 11.08  | 1.000 |                |                   |        |                  |        |       |

N: number of individuals, n: number of alleles (2n), %: allele frequency, p: Fisher's exact test (p ≤ 0.05).

**Additional file 1.4. HLA-A\*, B\*, C\*, DRB1\* and DQB1\* alleles frequencies in 44 BL leprosy and 478 healthy controls.**

| HLA allele | BL leprosy (N=44) |        | Controls (N=478) |        | p     | HLA allele | BL leprosy (N=44) |        | Controls (N=478) |        | p     |
|------------|-------------------|--------|------------------|--------|-------|------------|-------------------|--------|------------------|--------|-------|
|            | n                 | Fa (%) | n                | Fa (%) |       |            | n                 | Fa (%) | n                | Fa (%) |       |
|            |                   |        |                  |        |       |            |                   |        |                  |        |       |
| A*01       | 03                | 6.82   | 82               | 17.15  | 0.087 | A*31       | 02                | 4.54   | 48               | 10.04  | 0.417 |
| A*02       | 26                | 59.09  | 236              | 49.37  | 0.270 | A*32       | 04                | 9.09   | 34               | 7.11   | 0.549 |
| A*03       | 10                | 22.73  | 95               | 19.87  | 0.694 | A*33       | 01                | 2.27   | 25               | 5.23   | 0.714 |
| A*11       | 03                | 6.82   | 56               | 11.71  | 0.456 | A*34       | 00                | 0.00   | 11               | 2.30   | 0.611 |
| A*23       | 06                | 13.64  | 47               | 9.83   | 0.431 | A*36       | 01                | 2.27   | 06               | 1.25   | 0.462 |
| A*24       | 08                | 18.18  | 101              | 21.13  | 0.846 | A*66       | 00                | 0.00   | 05               | 1.05   | 1.000 |
| A*25       | 00                | 0.00   | 13               | 2.72   | 0.614 | A*68       | 04                | 9.09   | 51               | 10.67  | 1.000 |
| A*26       | 04                | 9.09   | 38               | 7.95   | 0.771 | A*69       | 00                | 0.00   | 03               | 0.63   | 1.000 |
| A*29       | 07                | 15.91  | 48               | 10.04  | 0.207 | A*74       | 02                | 4.54   | 04               | 0.84   | 0.083 |
| A*30       | 06                | 13.64  | 52               | 10.88  | 0.614 | A*80       | 01                | 2.27   | 01               | 0.21   | 0.161 |
| B*07       | 10                | 22.73  | 61               | 12.78  | 0.103 | B*47       | 00                | 0.00   | 00               | 0.00   | 1.000 |
| B*08       | 03                | 6.82   | 49               | 10.27  | 0.605 | B*48       | 00                | 0.00   | 03               | 0.62   | 1.000 |
| B*13       | 02                | 4.54   | 22               | 4.61   | 1.000 | B*49       | 02                | 4.54   | 29               | 6.07   | 1.000 |
| B*14       | 02                | 4.54   | 47               | 9.85   | 0.414 | B*50       | 02                | 4.54   | 30               | 6.28   | 1.000 |
| B*15       | 11                | 25.00  | 80               | 16.77  | 0.209 | B*51       | 07                | 15.91  | 86               | 18.02  | 0.839 |
| B*18       | 04                | 9.09   | 64               | 13.41  | 0.638 | B*52       | 00                | 0.00   | 19               | 3.98   | 0.391 |
| B*27       | 00                | 0.00   | 20               | 4.19   | 0.399 | B*53       | 04                | 9.09   | 14               | 2.93   | 0.056 |
| B*35       | 09                | 20.45  | 103              | 21.55  | 1.000 | B*54       | 00                | 0.00   | 01               | 0.20   | 1.000 |
| B*37       | 00                | 0.00   | 13               | 2.72   | 0.614 | B*55       | 00                | 0.00   | 14               | 2.93   | 0.620 |
| B*38       | 02                | 4.54   | 21               | 4.40   | 1.000 | B*56       | 00                | 0.00   | 04               | 0.83   | 1.000 |
| B*39       | 05                | 11.36  | 30               | 6.28   | 0.202 | B*57       | 02                | 4.54   | 25               | 5.24   | 1.000 |
| B*40       | 08                | 18.18  | 50               | 10.46  | 0.131 | B*58       | 00                | 0.00   | 24               | 5.03   | 0.249 |
| B*41       | 00                | 0.00   | 04               | 0.83   | 1.000 | B*59       | 00                | 0.00   | 01               | 0.20   | 1.000 |
| B*42       | 00                | 0.00   | 19               | 3.98   | 0.391 | B*73       | 00                | 0.00   | 01               | 0.20   | 1.000 |
| B*44       | 10                | 22.73  | 98               | 20.54  | 0.699 | B*78       | 00                | 0.00   | 01               | 0.20   | 1.000 |
| B*45       | 04                | 9.09   | 18               | 3.77   | 0.104 | B*81       | 01                | 2.27   | 05               | 1.05   | 0.412 |
| C*01       | 01                | 2.27   | 34               | 7.11   | 0.345 | C*08       | 04                | 9.09   | 47               | 9.83   | 1.000 |
| C*02       | 07                | 15.91  | 63               | 13.18  | 0.642 | C*12       | 04                | 9.09   | 64               | 13.39  | 0.638 |
| C*03       | 15                | 34.09  | 104              | 21.75  | 0.088 | C*14       | 04                | 9.09   | 18               | 3.76   | 0.104 |
| C*04       | 13                | 29.54  | 144              | 30.12  | 1.000 | C*15       | 02                | 4.54   | 50               | 10.46  | 0.294 |
| C*05       | 04                | 9.09   | 67               | 14.02  | 0.491 | C*16       | 05                | 11.36  | 26               | 5.44   | 0.169 |
| C*06       | 06                | 13.64  | 96               | 20.08  | 0.425 | C*17       | 00                | 0.00   | 23               | 4.81   | 0.245 |
| C*07       | 23                | 52.27  | 216              | 45.19  | 0.429 | C*18       | 00                | 0.00   | 04               | 0.84   | 1.000 |
| DRB1*01    | 12                | 27.27  | 94               | 19.66  | 0.241 | DRB1*11    | 14                | 31.82  | 108              | 22.59  | 0.191 |
| DRB1*03    | 04                | 9.09   | 85               | 17.78  | 0.206 | DRB1*12    | 01                | 2.27   | 15               | 3.13   | 1.000 |
| DRB1*04    | 08                | 18.18  | 87               | 18.20  | 1.000 | DRB1*13    | 14                | 31.82  | 155              | 32.42  | 1.000 |
| DRB1*07    | 05                | 11.36  | 128              | 26.77  | 0.028 | DRB1*14    | 04                | 9.09   | 56               | 11.71  | 0.805 |
| DRB1*08    | 07                | 15.91  | 36               | 7.53   | 0.077 | DRB1*15    | 13                | 29.54  | 111              | 23.22  | 0.356 |
| DRB1*09    | 01                | 2.27   | 20               | 4.18   | 1.000 | DRB1*16    | 03                | 6.82   | 36               | 7.53   | 1.000 |
| DRB1*10    | 02                | 4.54   | 25               | 5.23   | 1.000 |            |                   |        |                  |        |       |
| DQB1*02    | 8                 | 18.18  | 189              | 39.53  | 0.005 | DQB1*05    | 21                | 47.73  | 192              | 40.16  | 0.340 |
| DQB1*03    | 28                | 63.64  | 298              | 62.34  | 1.000 | DQB1*06    | 26                | 59.09  | 224              | 46.86  | 0.155 |
| DQB1*04    | 5                 | 11.36  | 53               | 11.08  | 1.000 |            |                   |        |                  |        |       |

N: number of individuals, n: number of alleles (2n), %: allele frequency, p: Fisher's exact test ( $p \leq 0.05$ ).

**Additional file 1.5. HLA-A\*, B\*, C\*, DRB1\* and DQB1\* alleles frequencies in 94 leprosy patients with reversal reaction and 94 no reaction leprosy.**

| HLA allele | Reversal reaction (N=94) |        | No reaction (N=94) |        | p     | HLA allele | Reversal reaction (N=94) |        | No reaction (N=94) |        | p     |
|------------|--------------------------|--------|--------------------|--------|-------|------------|--------------------------|--------|--------------------|--------|-------|
|            | n                        | Fa (%) | n                  | Fa (%) |       |            | n                        | Fa (%) | N                  | Fa (%) |       |
|            |                          |        |                    |        |       |            |                          |        |                    |        |       |
| A*01       | 19                       | 20.21  | 13                 | 13.83  | 0.332 | A*31       | 05                       | 5.32   | 07                 | 7.45   | 0.766 |
| A*02       | 52                       | 55.32  | 43                 | 45.74  | 0.243 | A*32       | 05                       | 5.32   | 04                 | 4.25   | 1.000 |
| A*03       | 25                       | 26.59  | 21                 | 22.34  | 0.611 | A*33       | 04                       | 4.25   | 06                 | 6.38   | 0.747 |
| A*11       | 07                       | 7.45   | 14                 | 14.89  | 0.163 | A*34       | 01                       | 1.06   | 01                 | 1.06   | 1.000 |
| A*23       | 06                       | 6.38   | 07                 | 7.45   | 1.000 | A*36       | 02                       | 2.13   | 00                 | 0.00   | 0.497 |
| A*24       | 19                       | 20.21  | 19                 | 20.21  | 1.000 | A*66       | 02                       | 2.13   | 00                 | 0.00   | 0.497 |
| A*25       | 01                       | 1.06   | 02                 | 2.13   | 1.000 | A*68       | 10                       | 10.64  | 15                 | 15.96  | 0.390 |
| A*26       | 10                       | 10.64  | 09                 | 9.57   | 1.000 | A*69       | 00                       | 0.00   | 00                 | 0.00   | 1.000 |
| A*29       | 04                       | 4.25   | 11                 | 11.70  | 0.103 | A*74       | 03                       | 3.19   | 02                 | 2.13   | 1.000 |
| A*30       | 12                       | 12.76  | 14                 | 14.89  | 0.833 | A*80       | 01                       | 1.06   | 00                 | 0.00   | 1.000 |
| B*07       | 19                       | 20.21  | 16                 | 17.02  | 0.708 | B*47       | 00                       | 0.00   | 01                 | 1.06   | 0.474 |
| B*08       | 17                       | 18.08  | 08                 | 8.51   | 0.084 | B*48       | 01                       | 1.06   | 00                 | 0.00   | 1.000 |
| B*13       | 04                       | 4.25   | 04                 | 4.25   | 1.000 | B*49       | 00                       | 0.00   | 02                 | 2.13   | 0.497 |
| B*14       | 09                       | 9.57   | 10                 | 10.64  | 1.000 | B*50       | 01                       | 1.06   | 02                 | 2.13   | 1.000 |
| B*15       | 27                       | 28.72  | 12                 | 12.76  | 0.011 | B*51       | 17                       | 18.08  | 15                 | 15.96  | 1.000 |
| B*18       | 07                       | 7.45   | 15                 | 15.96  | 0.070 | B*52       | 04                       | 4.25   | 03                 | 3.19   | 1.000 |
| B*27       | 02                       | 2.13   | 02                 | 2.13   | 1.000 | B*53       | 07                       | 7.45   | 06                 | 6.38   | 1.000 |
| B*35       | 18                       | 19.15  | 23                 | 24.47  | 0.480 | B*54       | 00                       | 0.00   | 00                 | 0.00   | 1.000 |
| B*37       | 01                       | 1.06   | 03                 | 3.19   | 0.621 | B*55       | 02                       | 2.13   | 01                 | 1.06   | 1.000 |
| B*38       | 03                       | 3.19   | 05                 | 5.32   | 0.720 | B*56       | 00                       | 0.00   | 01                 | 1.06   | 1.000 |
| B*39       | 08                       | 8.51   | 06                 | 6.38   | 0.782 | B*57       | 05                       | 5.32   | 05                 | 5.32   | 1.000 |
| B*40       | 06                       | 6.38   | 13                 | 13.83  | 0.145 | B*58       | 06                       | 6.38   | 06                 | 6.38   | 1.000 |
| B*41       | 02                       | 2.13   | 00                 | 0.00   | 0.497 | B*59       | 00                       | 0.00   | 00                 | 0.00   | 1.000 |
| B*42       | 04                       | 4.25   | 02                 | 2.13   | 0.682 | B*73       | 00                       | 0.00   | 00                 | 0.00   | 1.000 |
| B*44       | 11                       | 11.70  | 21                 | 22.34  | 0.079 | B*78       | 00                       | 0.00   | 00                 | 0.00   | 1.000 |
| B*45       | 04                       | 4.25   | 04                 | 4.25   | 1.000 | B*81       | 03                       | 3.19   | 02                 | 2.13   | 1.000 |
| C*01       | 04                       | 4.25   | 04                 | 4.25   | 1.000 | C*08       | 11                       | 11.70  | 13                 | 13.83  | 0.827 |
| C*02       | 08                       | 8.51   | 07                 | 7.45   | 1.000 | C*12       | 10                       | 10.64  | 17                 | 18.08  | 0.211 |
| C*03       | 28                       | 29.79  | 20                 | 21.28  | 0.241 | C*14       | 04                       | 4.25   | 02                 | 2.13   | 0.682 |
| C*04       | 27                       | 28.72  | 31                 | 32.98  | 0.635 | C*15       | 10                       | 10.64  | 10                 | 10.64  | 1.000 |
| C*05       | 03                       | 3.19   | 09                 | 9.57   | 0.133 | C*16       | 08                       | 8.51   | 12                 | 12.76  | 0.478 |
| C*06       | 16                       | 17.02  | 16                 | 17.02  | 1.000 | C*17       | 06                       | 6.38   | 02                 | 2.13   | 0.278 |
| C*07       | 51                       | 54.25  | 43                 | 45.74  | 1.000 | C*18       | 02                       | 2.13   | 02                 | 2.13   | 1.000 |
| DRB1*01    | 16                       | 17.02  | 17                 | 18.08  | 1.000 | DRB1*11    | 22                       | 23.40  | 29                 | 30.85  | 0.325 |
| DRB1*03    | 25                       | 26.59  | 15                 | 15.96  | 0.108 | DRB1*12    | 01                       | 1.06   | 03                 | 3.19   | 0.621 |
| DRB1*04    | 19                       | 20.21  | 18                 | 19.15  | 1.000 | DRB1*13    | 26                       | 27.66  | 34                 | 36.17  | 0.273 |
| DRB1*07    | 15                       | 15.96  | 15                 | 15.96  | 1.000 | DRB1*14    | 09                       | 9.57   | 09                 | 9.57   | 1.000 |
| DRB1*08    | 11                       | 11.70  | 06                 | 6.38   | 0.309 | DRB1*15    | 28                       | 29.79  | 23                 | 24.47  | 0.512 |
| DRB1*09    | 04                       | 4.25   | 02                 | 2.13   | 0.682 | DRB1*16    | 10                       | 10.64  | 10                 | 10.64  | 1.000 |
| DRB1*10    | 02                       | 2.13   | 07                 | 7.45   | 0.169 |            |                          |        |                    |        |       |
| DQB1*02    | 37                       | 37.23  | 28                 | 29.79  | 0.354 | DQB1*05    | 38                       | 40.42  | 45                 | 47.87  | 0.378 |
| DQB1*03    | 57                       | 60.64  | 58                 | 61.70  | 1.000 | DQB1*06    | 46                       | 48.94  | 52                 | 55.32  | 0.465 |
| DQB1*04    | 12                       | 12.76  | 05                 | 5.32   | 0.125 |            |                          |        |                    |        |       |

N: number of individuals, n: number of alleles (2n), %: allele frequency, p: Fisher's exact test (p ≤ 0.05).
