# Supplementary material for: Human leukocyte antigen class I and class II alleles are associated with susceptibility and resistance in borderline leprosy patients from Southeast Brazil
Source: PubMed Central journal article supplement (PMC4307149; doi:10.1186/s12879-015-0751-0), 2015-01-21
Supplement: 12879_2015_751_MOESM2_ESM.pdf [file 12879_2015_751_MOESM2_ESM.pdf]

**Additional file 2.1. HLA-A\*, B\*, C\*, DRB1\* and DQB1\* alleles frequencies in 70 BT leprosy and 132 BB and BL leprosy patients controls.**

| HLA allele     | BT leprosy (N=70) |        | BB+BL (N=132) |        | p     | HLA allele     | BT leprosy (N=70) |        | BB+BL (N=132) |        | p     |
|----------------|-------------------|--------|---------------|--------|-------|----------------|-------------------|--------|---------------|--------|-------|
|                | n                 | Fa (%) | n             | Fa (%) |       |                | n                 | Fa (%) | n             | Fa (%) |       |
|                | <b>A*01</b>       | 13     | 18.57         | 20     |       |                | 9.85              | 0.552  | <b>A*31</b>   | 04     |       |
| <b>A*02</b>    | 37                | 52.86  | 70            | 53.03  | 1.000 | <b>A*32</b>    | 03                | 4.28   | 08            | 6.06   | 0.750 |
| <b>A*03</b>    | 19                | 27.14  | 31            | 23.48  | 0.608 | <b>A*33</b>    | 08                | 11.43  | 04            | 3.03   | 0.025 |
| <b>A*11</b>    | 05                | 7.14   | 17            | 12.88  | 0.244 | <b>A*34</b>    | 00                | 0.00   | 02            | 1.51   | 0.544 |
| <b>A*23</b>    | 04                | 5.71   | 10            | 7.57   | 0.774 | <b>A*36</b>    | 01                | 1.43   | 01            | 0.76   | 1.000 |
| <b>A*24</b>    | 13                | 18.57  | 27            | 20.45  | 0.853 | <b>A*66</b>    | 02                | 2.86   | 00            | 0.00   | 0.119 |
| <b>A*25</b>    | 02                | 2.86   | 01            | 0.76   | 0.276 | <b>A*68</b>    | 08                | 11.43  | 17            | 12.88  | 0.826 |
| <b>A*26</b>    | 05                | 7.14   | 14            | 10.61  | 0.613 | <b>A*69</b>    | 00                | 0.00   | 00            | 0.00   | 1.000 |
| <b>A*29</b>    | 04                | 5.71   | 12            | 9.09   | 0.585 | <b>A*74</b>    | 02                | 2.86   | 03            | 2.27   | 1.000 |
| <b>A*30</b>    | 10                | 14.28  | 17            | 12.88  | 0.829 | <b>A*80</b>    | 00                | 0.00   | 01            | 0.76   | 1.000 |
| <b>B*07</b>    | 15                | 21.43  | 23            | 17.42  | 0.570 | <b>B*47</b>    | 01                | 1.43   | 01            | 0.76   | 1.000 |
| <b>B*08</b>    | 10                | 14.28  | 15            | 11.36  | 0.654 | <b>B*48</b>    | 01                | 1.43   | 00            | 0.00   | 0.346 |
| <b>B*13</b>    | 03                | 4.28   | 04            | 3.03   | 0.695 | <b>B*49</b>    | 00                | 0.00   | 02            | 1.51   | 0.544 |
| <b>B*14</b>    | 08                | 11.43  | 12            | 9.09   | 0.625 | <b>B*50</b>    | 01                | 1.43   | 03            | 2.27   | 1.000 |
| <b>B*15</b>    | 16                | 22.85  | 24            | 18.18  | 0.460 | <b>B*51</b>    | 16                | 22.85  | 19            | 14.39  | 0.170 |
| <b>B*18</b>    | 11                | 15.71  | 14            | 10.61  | 0.369 | <b>B*52</b>    | 02                | 2.86   | 05            | 3.79   | 1.000 |
| <b>B*27</b>    | 00                | 0.00   | 04            | 3.03   | 0.300 | <b>B*53</b>    | 06                | 8.57   | 08            | 6.06   | 0.564 |
| <b>B*35</b>    | 14                | 20.0   | 30            | 22.73  | 0.722 | <b>B*54</b>    | 00                | 0.00   | 00            | 0.00   | 1.000 |
| <b>B*37</b>    | 02                | 2.86   | 03            | 2.27   | 1.000 | <b>B*55</b>    | 02                | 2.86   | 01            | 0.76   | 0.276 |
| <b>B*38</b>    | 02                | 2.86   | 07            | 5.30   | 0.721 | <b>B*56</b>    | 00                | 0.00   | 01            | 0.76   | 1.000 |
| <b>B*39</b>    | 06                | 8.57   | 09            | 6.82   | 0.778 | <b>B*57</b>    | 03                | 4.28   | 07            | 5.30   | 1.000 |
| <b>B*40</b>    | 02                | 2.86   | 21            | 15.91  | 0.014 | <b>B*58</b>    | 02                | 2.86   | 10            | 7.57   | 0.223 |
| <b>B*41</b>    | 00                | 0.00   | 02            | 1.51   | 0.544 | <b>B*59</b>    | 00                | 0.00   | 00            | 0.00   | 1.000 |
| <b>B*42</b>    | 03                | 4.28   | 03            | 2.27   | 0.419 | <b>B*73</b>    | 00                | 0.00   | 00            | 0.00   | 1.000 |
| <b>B*44</b>    | 09                | 12.86  | 26            | 19.70  | 0.247 | <b>B*78</b>    | 00                | 0.00   | 00            | 0.00   | 1.000 |
| <b>B*45</b>    | 02                | 2.86   | 08            | 6.06   | 0.499 | <b>B*81</b>    | 03                | 4.28   | 02            | 1.51   | 0.343 |
| <b>C*01</b>    | 02                | 2.86   | 06            | 4.54   | 0.716 | <b>C*08</b>    | 09                | 12.85  | 16            | 12.12  | 1.000 |
| <b>C*02</b>    | 04                | 5.71   | 14            | 10.61  | 0.306 | <b>C*12</b>    | 08                | 11.43  | 23            | 17.42  | 0.309 |
| <b>C*03</b>    | 17                | 24.28  | 35            | 26.51  | 0.865 | <b>C*14</b>    | 04                | 5.71   | 04            | 3.03   | 0.452 |
| <b>C*04</b>    | 24                | 34.28  | 38            | 28.79  | 0.427 | <b>C*15</b>    | 10                | 14.28  | 10            | 7.57   | 0.142 |
| <b>C*05</b>    | 03                | 4.28   | 09            | 6.82   | 0.549 | <b>C*16</b>    | 09                | 12.86  | 12            | 9.09   | 0.469 |
| <b>C*06</b>    | 09                | 12.85  | 27            | 20.45  | 0.246 | <b>C*17</b>    | 04                | 5.71   | 04            | 3.03   | 0.452 |
| <b>C*07</b>    | 35                | 50.00  | 64            | 48.48  | 0.883 | <b>C*18</b>    | 02                | 2.86   | 02            | 1.51   | 0.610 |
| <b>DRB1*01</b> | 11                | 15.71  | 26            | 19.70  | 0.568 | <b>DRB1*11</b> | 15                | 21.43  | 40            | 30.30  | 0.188 |
| <b>DRB1*03</b> | 20                | 28.57  | 21            | 15.91  | 0.035 | <b>DRB1*12</b> | 02                | 2.86   | 02            | 1.51   | 0.610 |
| <b>DRB1*04</b> | 11                | 15.71  | 26            | 19.70  | 0.568 | <b>DRB1*13</b> | 26                | 37.14  | 39            | 29.54  | 0.273 |
| <b>DRB1*07</b> | 12                | 17.14  | 21            | 15.90  | 0.843 | <b>DRB1*14</b> | 05                | 7.14   | 14            | 10.61  | 0.613 |
| <b>DRB1*08</b> | 07                | 10.00  | 13            | 9.85   | 1.000 | <b>DRB1*15</b> | 17                | 24.28  | 39            | 29.54  | 0.509 |
| <b>DRB1*09</b> | 04                | 5.71   | 02            | 1.51   | 0.185 | <b>DRB1*16</b> | 09                | 12.86  | 13            | 9.85   | 0.635 |
| <b>DRB1*10</b> | 01                | 1.43   | 08            | 6.06   | 0.167 |                |                   |        |               |        |       |
| <b>DQB1*02</b> | 30                | 42.85  | 37            | 28.03  | 0.048 | <b>DQB1*05</b> | 30                | 42.85  | 62            | 46.97  | 0.656 |
| <b>DQB1*03</b> | 36                | 51.43  | 82            | 62.12  | 0.177 | <b>DQB1*06</b> | 37                | 52.85  | 71            | 53.79  | 1.000 |
| <b>DQB1*04</b> | 07                | 10.00  | 12            | 9.09   | 0.805 |                |                   |        |               |        |       |

N: number of individuals, n: number of alleles (2n); %: allele frequency, p: Fisher's exact test p ≤ 0.05.

**Additional file 2.2. HLA-A\*, B\*, C\*, DRB1\* and DQB1\* alleles frequencies in 88 BB leprosy and 114 BT and BL leprosy patients controls.**

| HLA allele | BB leprosy (N=88) |        | BT+BL (N=114) |        | p     | HLA allele | BB leprosy (N=88) |        | BT+BL (N=114) |        | p     |
|------------|-------------------|--------|---------------|--------|-------|------------|-------------------|--------|---------------|--------|-------|
|            | n                 | Fa (%) | n             | Fa (%) |       |            | n                 | Fa (%) | n             | Fa (%) |       |
| A*01       | 17                | 19.31  | 16            | 14.03  | 0.341 | A*31       | 07                | 7.95   | 06            | 5.26   | 0.565 |
| A*02       | 44                | 50.00  | 63            | 55.26  | 0.479 | A*32       | 04                | 4.54   | 07            | 6.14   | 0.759 |
| A*03       | 21                | 23.86  | 29            | 25.44  | 0.870 | A*33       | 03                | 3.41   | 09            | 7.89   | 0.236 |
| A*11       | 14                | 15.90  | 08            | 7.02   | 0.066 | A*34       | 02                | 2.27   | 00            | 0.00   | 0.188 |
| A*23       | 04                | 4.54   | 10            | 8.77   | 0.277 | A*36       | 00                | 0.00   | 02            | 1.75   | 0.505 |
| A*24       | 19                | 21.59  | 21            | 18.42  | 0.597 | A*66       | 00                | 0.00   | 02            | 1.75   | 0.505 |
| A*25       | 01                | 1.14   | 02            | 1.75   | 1.000 | A*68       | 13                | 14.77  | 12            | 10.52  | 0.394 |
| A*26       | 10                | 11.36  | 09            | 7.89   | 0.465 | A*69       | 00                | 0.00   | 00            | 0.00   | 1.000 |
| A*29       | 05                | 5.68   | 11            | 9.65   | 0.431 | A*74       | 01                | 1.14   | 04            | 3.51   | 0.389 |
| A*30       | 11                | 12.50  | 16            | 14.03  | 0.836 | A*80       | 00                | 0.00   | 01            | 0.88   | 1.000 |
| B*07       | 13                | 14.77  | 25            | 21.93  | 0.209 | B*47       | 01                | 1.14   | 01            | 0.88   | 1.000 |
| B*08       | 12                | 13.64  | 13            | 11.40  | 0.670 | B*48       | 00                | 0.00   | 01            | 0.88   | 1.000 |
| B*13       | 02                | 2.27   | 05            | 4.38   | 0.701 | B*49       | 00                | 0.00   | 02            | 1.75   | 0.505 |
| B*14       | 10                | 11.36  | 10            | 0.88   | 0.636 | B*50       | 01                | 1.14   | 03            | 2.63   | 0.633 |
| B*15       | 13                | 14.77  | 27            | 23.68  | 0.154 | B*51       | 12                | 13.64  | 23            | 20.17  | 0.263 |
| B*18       | 10                | 11.36  | 15            | 13.16  | 0.830 | B*52       | 05                | 5.68   | 02            | 1.75   | 0.243 |
| B*27       | 04                | 4.54   | 00            | 0.00   | 0.094 | B*53       | 04                | 4.54   | 10            | 8.77   | 0.277 |
| B*35       | 21                | 23.86  | 23            | 20.17  | 0.606 | B*54       | 00                | 0.00   | 00            | 0.00   | 1.000 |
| B*37       | 03                | 3.41   | 02            | 1.75   | 0.654 | B*55       | 01                | 1.14   | 02            | 1.75   | 1.000 |
| B*38       | 05                | 5.68   | 04            | 3.51   | 0.507 | B*56       | 01                | 1.14   | 00            | 0.00   | 1.000 |
| B*39       | 04                | 4.54   | 11            | 9.65   | 0.189 | B*57       | 05                | 5.68   | 05            | 4.38   | 0.749 |
| B*40       | 13                | 14.77  | 10            | 8.77   | 0.376 | B*58       | 10                | 11.36  | 02            | 1.75   | 0.012 |
| B*41       | 02                | 2.27   | 00            | 0.00   | 0.188 | B*59       | 00                | 0.00   | 00            | 0.00   | 1.000 |
| B*42       | 03                | 3.41   | 03            | 2.63   | 1.000 | B*73       | 00                | 0.00   | 00            | 0.00   | 1.000 |
| B*44       | 16                | 18.18  | 19            | 16.67  | 0.852 | B*78       | 00                | 0.00   | 00            | 0.00   | 1.000 |
| B*45       | 04                | 4.54   | 06            | 5.26   | 1.000 | B*81       | 01                | 1.14   | 04            | 3.51   | 0.389 |
| C*01       | 05                | 5.68   | 03            | 2.63   | 0.299 | C*08       | 12                | 13.64  | 13            | 11.40  | 0.670 |
| C*02       | 07                | 7.95   | 11            | 9.64   | 0.805 | C*12       | 19                | 21.59  | 12            | 10.53  | 0.033 |
| C*03       | 20                | 22.73  | 32            | 28.07  | 0.420 | C*14       | 00                | 0.00   | 08            | 7.02   | 0.070 |
| C*04       | 25                | 28.41  | 37            | 32.45  | 0.644 | C*15       | 08                | 9.09   | 12            | 10.53  | 0.815 |
| C*05       | 05                | 5.68   | 07            | 6.14   | 1.000 | C*16       | 07                | 7.95   | 14            | 12.28  | 0.360 |
| C*06       | 21                | 23.86  | 15            | 13.16  | 0.063 | C*17       | 04                | 4.54   | 04            | 3.51   | 0.730 |
| C*07       | 41                | 46.59  | 58            | 50.88  | 0.572 | C*18       | 02                | 2.27   | 02            | 1.75   | 1.000 |
| DRB1*01    | 14                | 15.91  | 23            | 20.17  | 0.468 | DRB1*11    | 26                | 29.54  | 29            | 25.44  | 0.527 |
| DRB1*03    | 17                | 19.32  | 24            | 21.05  | 0.860 | DRB1*12    | 01                | 1.14   | 03            | 2.63   | 0.633 |
| DRB1*04    | 18                | 20.45  | 19            | 16.67  | 0.590 | DRB1*13    | 25                | 28.41  | 40            | 35.09  | 0.363 |
| DRB1*07    | 16                | 18.18  | 17            | 14.91  | 0.568 | DRB1*14    | 10                | 11.36  | 09            | 7.89   | 0.469 |
| DRB1*08    | 06                | 6.82   | 14            | 12.28  | 0.239 | DRB1*15    | 26                | 29.54  | 30            | 26.31  | 0.637 |
| DRB1*09    | 01                | 1.14   | 05            | 4.38   | 0.235 | DRB1*16    | 10                | 11.36  | 12            | 10.53  | 1.000 |
| DRB1*10    | 06                | 6.82   | 03            | 2.63   | 0.181 |            |                   |        |               |        |       |
| DQB1*02    | 29                | 32.95  | 38            | 33.33  | 1.000 | DQB1*05    | 41                | 46.59  | 51            | 44.74  | 0.886 |
| DQB1*03    | 54                | 61.36  | 64            | 56.14  | 0.474 | DQB1*06    | 45                | 51.14  | 63            | 55.26  | 0.572 |
| DQB1*04    | 07                | 7.95   | 12            | 10.53  | 0.630 |            |                   |        |               |        |       |

N: number of individuals, n: number of alleles (2n); %: allele frequency, p: Fisher's exact test  $p \leq 0.05$ .

**Additional file 2.3. HLA-A\*, B\*, C\*, DRB1\* and DQB1\* alleles frequencies in 44 BL leprosy and 158 BT and BB leprosy patients controls.**

| HLA allele | BL leprosy (N=44) |        | BT+BB (N=158) |        | p     | HLA allele | BL leprosy (N=44) |        | BT+BB (N=158) |        | p     |
|------------|-------------------|--------|---------------|--------|-------|------------|-------------------|--------|---------------|--------|-------|
|            | n                 | Fa (%) | n             | Fa (%) |       |            | n                 | Fa (%) | n             | Fa (%) |       |
| A*01       | 03                | 6.82   | 30            | 18.99  | 0.064 | A*31       | 02                | 4.54   | 11            | 6.96   | 0.737 |
| A*02       | 26                | 59.09  | 81            | 61.36  | 0.396 | A*32       | 04                | 9.09   | 07            | 4.43   | 0.259 |
| A*03       | 10                | 22.73  | 40            | 30.30  | 0.844 | A*33       | 01                | 2.27   | 11            | 6.96   | 0.469 |
| A*11       | 03                | 6.82   | 19            | 14.40  | 0.420 | A*34       | 00                | 0.00   | 02            | 1.26   | 1.000 |
| A*23       | 06                | 13.64  | 08            | 6.06   | 0.084 | A*36       | 01                | 2.27   | 01            | 0.63   | 0.389 |
| A*24       | 08                | 18.18  | 32            | 20.25  | 0.833 | A*66       | 00                | 0.00   | 02            | 1.26   | 1.000 |
| A*25       | 00                | 0.00   | 03            | 1.90   | 1.000 | A*68       | 04                | 9.09   | 21            | 13.29  | 0.607 |
| A*26       | 04                | 9.09   | 15            | 9.50   | 1.000 | A*69       | 00                | 0.00   | 00            | 0.00   | 1.000 |
| A*29       | 07                | 15.91  | 09            | 5.70   | 0.051 | A*74       | 02                | 4.54   | 03            | 1.90   | 0.298 |
| A*30       | 06                | 13.64  | 21            | 13.29  | 1.000 | A*80       | 01                | 2.27   | 00            | 0.00   | 0.217 |
| B*07       | 10                | 22.73  | 28            | 17.72  | 0.513 | B*47       | 00                | 0.00   | 02            | 1.26   | 1.000 |
| B*08       | 03                | 6.82   | 22            | 13.92  | 0.300 | B*48       | 00                | 0.00   | 01            | 0.63   | 1.000 |
| B*13       | 02                | 4.54   | 05            | 3.16   | 0.647 | B*49       | 02                | 4.54   | 00            | 0.00   | 0.046 |
| B*14       | 02                | 4.54   | 18            | 11.39  | 0.256 | B*50       | 02                | 4.54   | 02            | 1.26   | 0.207 |
| B*15       | 11                | 25.00  | 29            | 18.35  | 0.392 | B*51       | 07                | 15.91  | 28            | 17.72  | 1.000 |
| B*18       | 04                | 9.09   | 21            | 13.29  | 0.607 | B*52       | 00                | 0.00   | 07            | 4.43   | 0.350 |
| B*27       | 00                | 0.00   | 04            | 2.53   | 0.578 | B*53       | 04                | 9.09   | 10            | 6.33   | 0.510 |
| B*35       | 09                | 20.45  | 35            | 22.15  | 1.000 | B*54       | 00                | 0.00   | 00            | 0.00   | 1.000 |
| B*37       | 00                | 0.00   | 05            | 3.16   | 0.587 | B*55       | 00                | 0.00   | 03            | 1.90   | 1.000 |
| B*38       | 02                | 4.54   | 07            | 4.43   | 1.000 | B*56       | 00                | 0.00   | 01            | 0.63   | 1.000 |
| B*39       | 05                | 11.36  | 10            | 6.33   | 0.326 | B*57       | 02                | 4.54   | 08            | 5.06   | 1.000 |
| B*40       | 08                | 18.18  | 15            | 9.49   | 0.114 | B*58       | 00                | 0.00   | 12            | 7.59   | 0.072 |
| B*41       | 00                | 0.00   | 02            | 1.26   | 1.000 | B*59       | 00                | 0.00   | 00            | 0.00   | 1.000 |
| B*42       | 00                | 0.00   | 06            | 3.80   | 0.343 | B*73       | 00                | 0.00   | 00            | 0.00   | 1.000 |
| B*44       | 10                | 22.73  | 25            | 18.82  | 0.366 | B*78       | 00                | 0.00   | 00            | 0.00   | 1.000 |
| B*45       | 04                | 9.09   | 06            | 3.80   | 0.229 | B*81       | 01                | 2.27   | 04            | 2.53   | 1.000 |
| C*01       | 01                | 2.27   | 07            | 4.43   | 1.000 | C*08       | 04                | 9.09   | 21            | 13.29  | 0.607 |
| C*02       | 07                | 15.91  | 11            | 6.96   | 0.076 | C*12       | 04                | 9.09   | 27            | 17.09  | 0.241 |
| C*03       | 15                | 34.09  | 37            | 23.42  | 0.173 | C*14       | 04                | 9.09   | 04            | 2.53   | 0.070 |
| C*04       | 13                | 29.54  | 49            | 31.01  | 1.000 | C*15       | 02                | 4.54   | 18            | 11.39  | 0.256 |
| C*05       | 04                | 9.09   | 08            | 6.06   | 0.297 | C*16       | 05                | 11.36  | 16            | 10.13  | 0.783 |
| C*06       | 06                | 13.64  | 30            | 18.99  | 0.507 | C*17       | 00                | 0.00   | 08            | 6.06   | 0.204 |
| C*07       | 23                | 52.27  | 76            | 48.10  | 0.733 | C*18       | 00                | 0.00   | 04            | 2.53   | 0.578 |
| DRB1*01    | 12                | 27.27  | 25            | 18.82  | 0.120 | DRB1*11    | 14                | 31.82  | 41            | 25.95  | 0.448 |
| DRB1*03    | 04                | 9.09   | 37            | 23.41  | 0.044 | DRB1*12    | 01                | 2.27   | 03            | 1.90   | 1.000 |
| DRB1*04    | 08                | 18.18  | 29            | 18.35  | 1.000 | DRB1*13    | 14                | 31.82  | 51            | 32.28  | 1.000 |
| DRB1*07    | 05                | 11.36  | 28            | 17.72  | 0.365 | DRB1*14    | 04                | 9.09   | 15            | 9.49   | 1.000 |
| DRB1*08    | 07                | 15.91  | 13            | 8.23   | 0.153 | DRB1*15    | 13                | 29.54  | 43            | 27.21  | 0.849 |
| DRB1*09    | 01                | 2.27   | 05            | 3.16   | 1.000 | DRB1*16    | 03                | 6.82   | 19            | 12.02  | 0.420 |
| DRB1*10    | 02                | 4.54   | 07            | 4.43   | 1.000 |            |                   |        |               |        |       |
| DQB1*02    | 8                 | 18.18  | 59            | 37.34  | 0.020 | DQB1*05    | 21                | 47.73  | 71            | 44.94  | 0.864 |
| DQB1*03    | 28                | 63.64  | 90            | 56.96  | 0.490 | DQB1*06    | 26                | 59.09  | 82            | 51.90  | 0.494 |
| DQB1*04    | 5                 | 11.36  | 14            | 8.86   | 0.570 |            |                   |        |               |        |       |

N: number of individuals, n: number of alleles (2n); Fa: allele frequency, p: Fisher's exact test  $p \leq 0.05$ .
